# Supplementary material
Source: PubMed Central journal article supplement (PMC10170013)

# Species PCoA Plot [taxonomic\_classification]

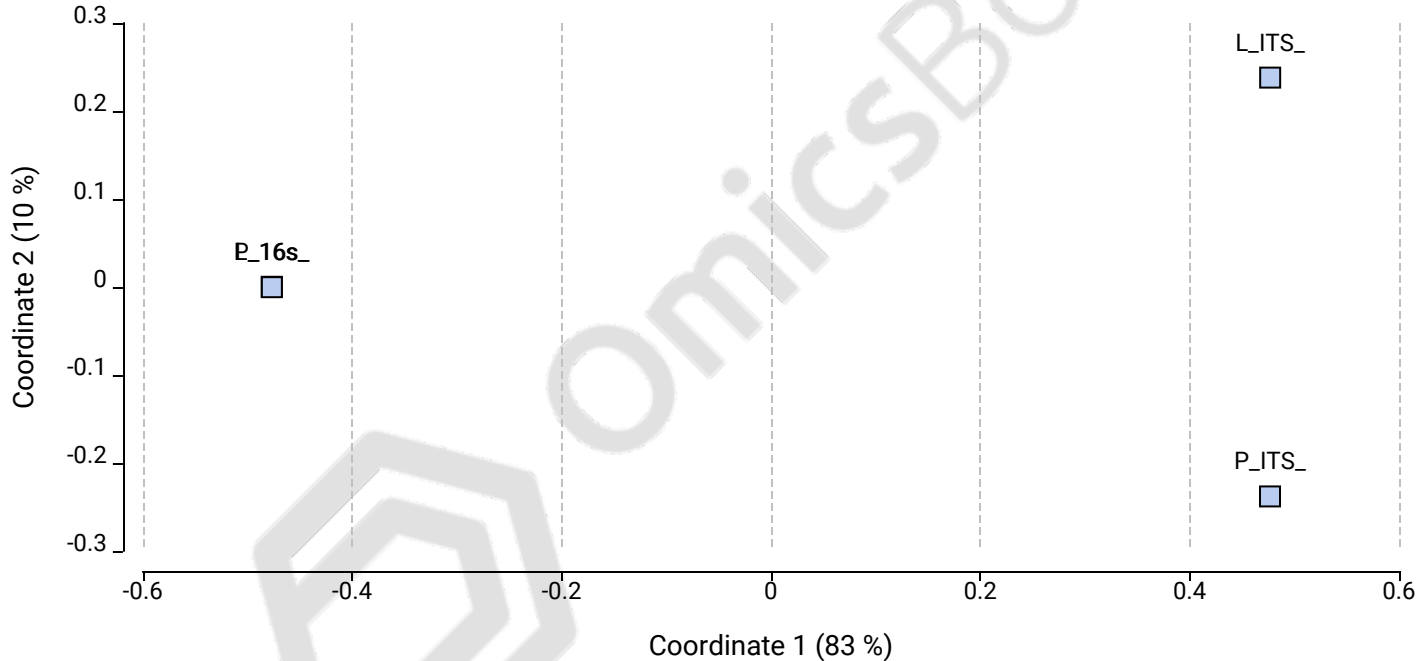

Supplement: 13197_2023_5725_MOESM7_ESM.pdf [file 13197_2023_5725_MOESM7_ESM.pdf]
